# Supplementary material
Source: PubMed Central journal article supplement (PMC5910063)
Supplement: NIHMS899845-supplement-Supplementary_Information.pdf [file NIHMS899845-supplement-Supplementary_Information.pdf]

# Supplementary Information Figure 1

Extended data Figure 4a

The orientation of some gels has been flipped to improve the readability of the notation

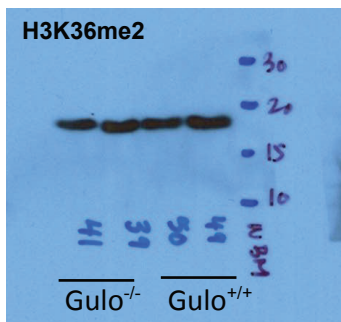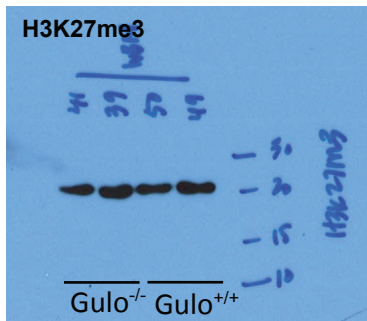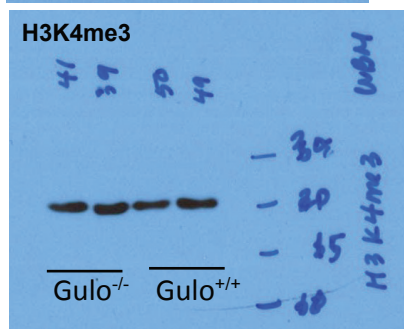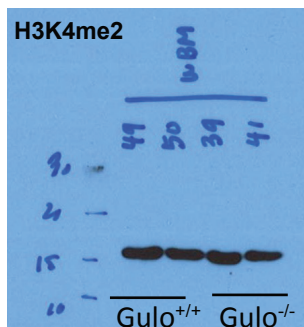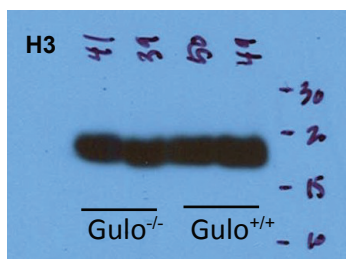

Extended data Figure 10c

Group 1:  $+/+$  to  $+/+$

Group 2:  $Tet2^{\Delta/+}; Flt3^{ITD/+}$  to  $+/+$

Group 3:  $Tet2^{\Delta/+}; Flt3^{ITD/+}$  to  $Gulo^{-/-}$

ED Figure 10c shows data from Groups 2 and 3

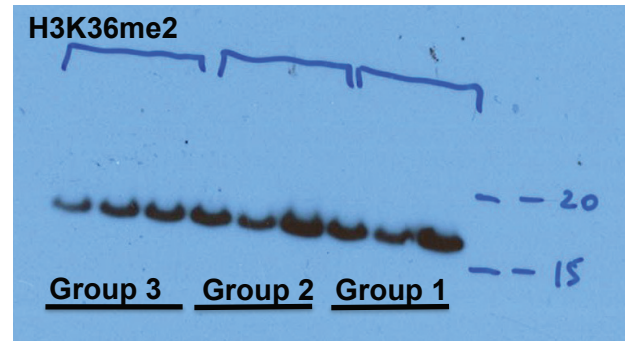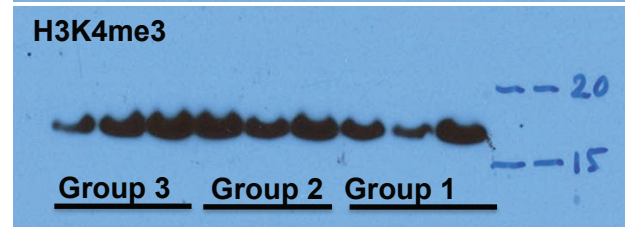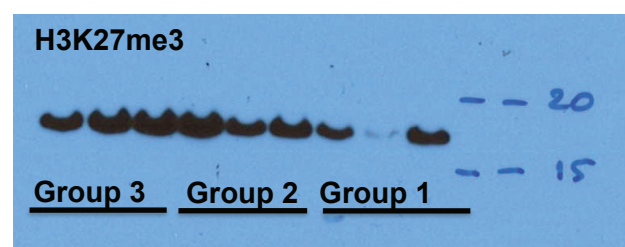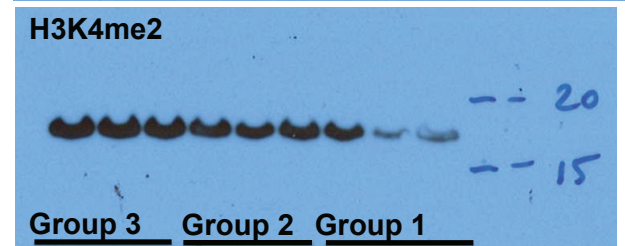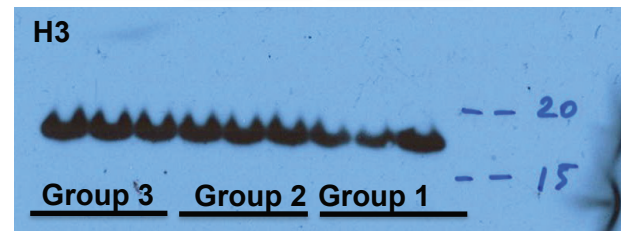

## Supplementary Information Figure 2

Typical flow cytometry plots and gates that are used to identify the cell populations listed in the bottom right corner

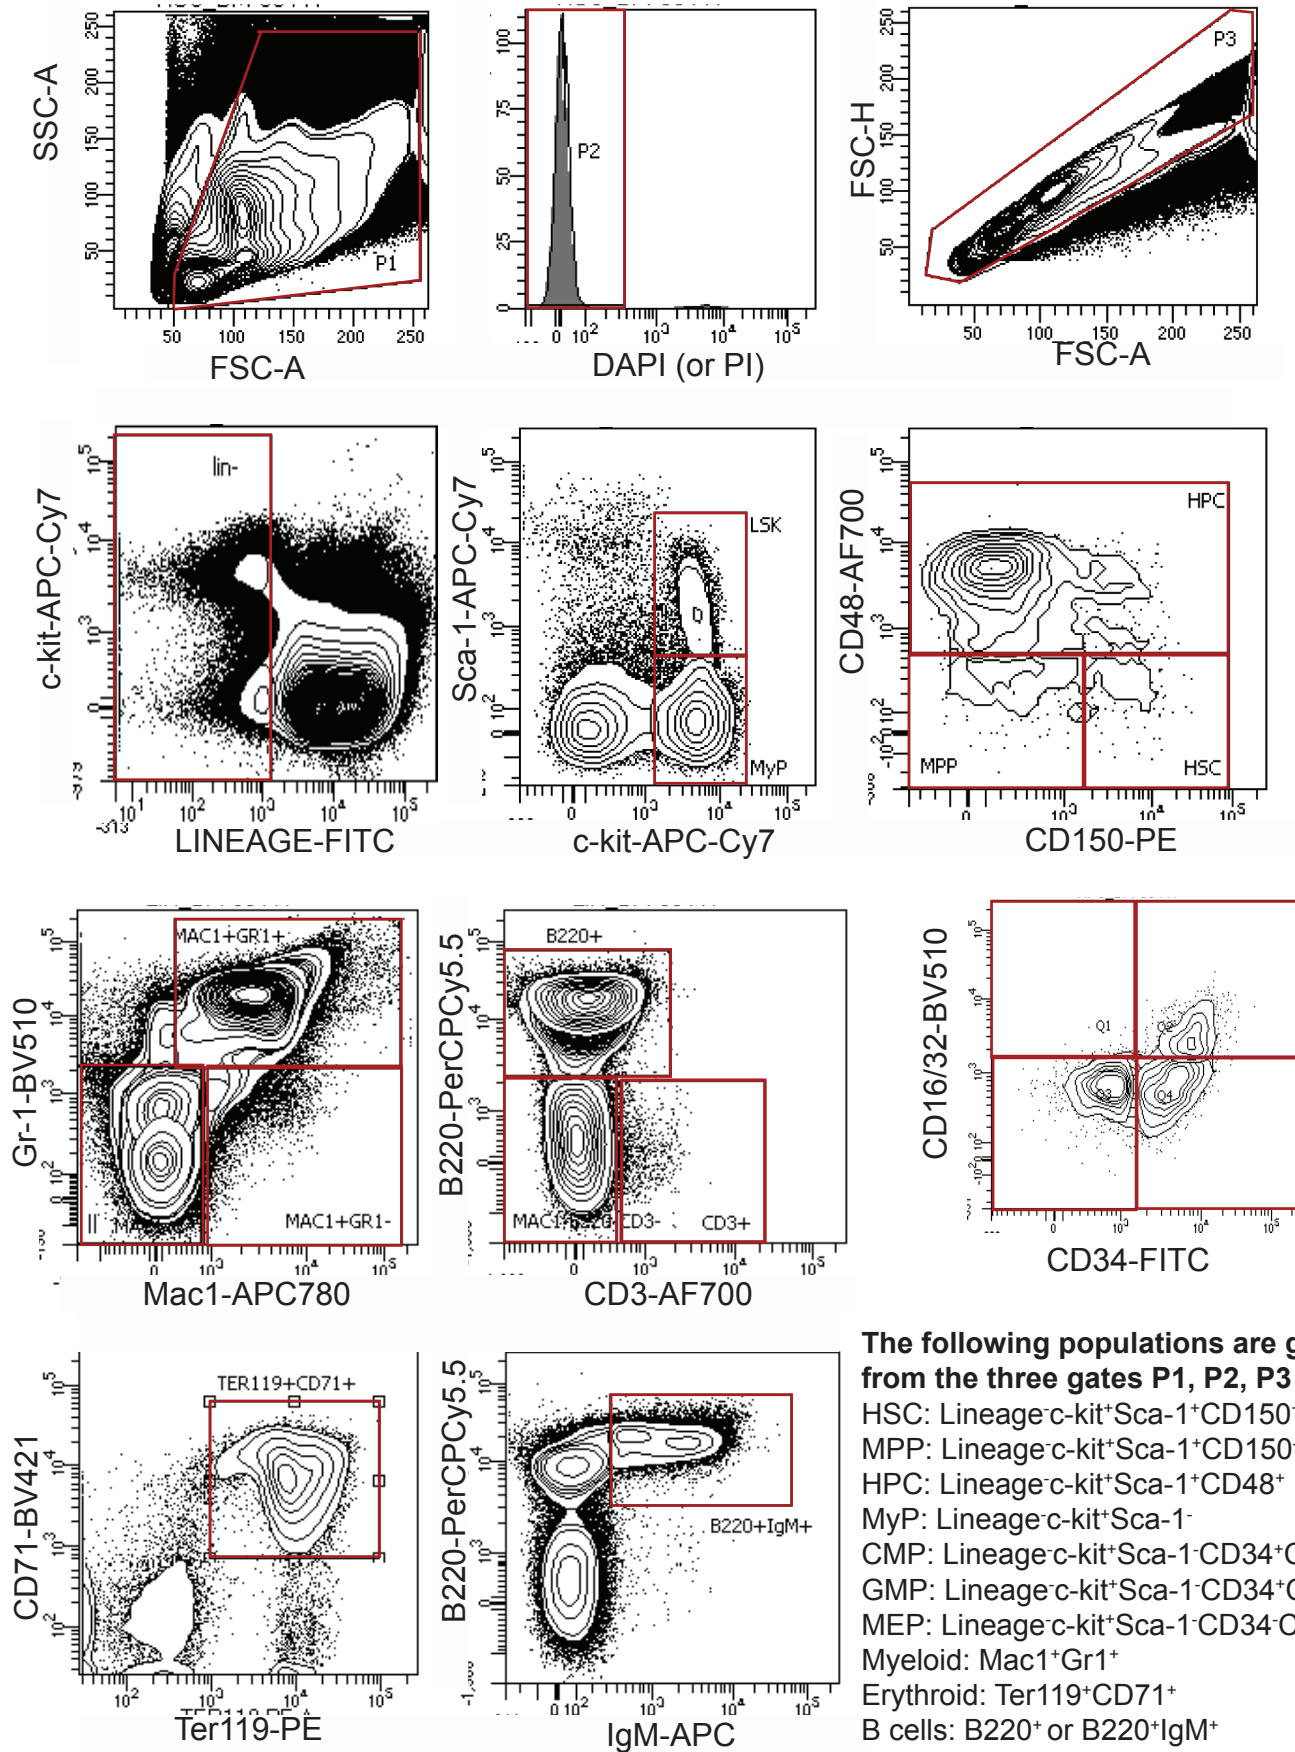

The following populations are gated from the three gates P1, P2, P3 in the top row

HSC: Lineage<sup>-</sup>c-kit<sup>+</sup>Sca-1<sup>+</sup>CD150<sup>+</sup>CD48<sup>-</sup>

MPP: Lineage<sup>-</sup>c-kit<sup>+</sup>Sca-1<sup>+</sup>CD150<sup>-</sup>CD48<sup>-</sup>

HPC: Lineage<sup>-</sup>c-kit<sup>+</sup>Sca-1<sup>+</sup>CD48<sup>+</sup>

MyP: Lineage<sup>-</sup>c-kit<sup>+</sup>Sca-1<sup>-</sup>

CMP: Lineage<sup>-</sup>c-kit<sup>+</sup>Sca-1<sup>-</sup>CD34<sup>+</sup>CD16/32<sup>-</sup>

GMP: Lineage<sup>-</sup>c-kit<sup>+</sup>Sca-1<sup>-</sup>CD34<sup>+</sup>CD16/32<sup>+</sup>

MEP: Lineage<sup>-</sup>c-kit<sup>+</sup>Sca-1<sup>-</sup>CD34<sup>-</sup>CD16/32<sup>-</sup>

Myeloid: Mac1<sup>+</sup>Gr1<sup>+</sup>

Erythroid: Ter119<sup>+</sup>CD71<sup>+</sup>

B cells: B220<sup>+</sup> or B220<sup>+</sup>IgM<sup>+</sup>

T cells: CD3<sup>+</sup>

## Supplementary Information Table 1

| <u>Name</u>                                        | <u>Clone</u>  | <u>Supplier</u>   | <u>Catalogue #</u> | <u>Lot #</u>   |
|----------------------------------------------------|---------------|-------------------|--------------------|----------------|
| <u>Flow cytometry antibodies (for mouse cells)</u> |               |                   |                    |                |
| CD2                                                | RM2-5         | TONBO biosciences | 35-0021            | C0021031114353 |
| CD3ε                                               | 17A2          | TONBO biosciences | 35-0032            | C003203817353  |
| CD4                                                | GK1.5         | eBioscience       | 11-0041-85         | E00079-1631    |
| CD5                                                | 53-7.3        | BioLegend         | 100606             | b210716        |
| CD8α                                               | 53-6.7        | TONBO biosciences | 35-0081            | c0081060514354 |
| CD11b                                              | M1/70         | eBioscience       | 17-0112-83         | 4305916        |
| CD16/32                                            | 93            | BioLegend         | 101333             | B228805        |
| CD24                                               | M1/69         | BioLegend         | 101822             | B211998        |
| CD25                                               | PC61.5        | TONBO biosciences | 65-0251            | C0251102115653 |
| CD34                                               | RAM34         | eBioscience       | 50-0341-82         | 4273958        |
| CD43                                               | eBioR2/60     | eBioscience       | 11-0431-82         | 4298067        |
| CD44                                               | IM7           | BioLegend         | 103030             | B193069        |
| CD45.1                                             | A20           | TONBO biosciences | 75-0453            | C0453092316753 |
| CD45.2                                             | 104           | BioLegend         | 109806             | B180276        |
| CD45R/B220                                         | RA3-6B2       | TONBO biosciences | 35-0452            | C0452011017354 |
| CD48                                               | HM48-1        | BioLegend         | 103426             | B236445        |
| CD71                                               | R17217        | eBioscience       | 12-0711-83         | E01341-1634    |
| CD117/cKit                                         | 2B8           | eBioscience       | 47-1171-82         | 4292975        |
| CD127/IL7Rα                                        | A7R34         | TONBO biosciences | 50-2171            | C1271052316503 |
| CD135/Flt3                                         | A2F10         | eBioscience       | 12-1351-83         | E01495-1632    |
| CD150                                              | TC15-12F12.2  | BioLegend         | 115904             | B210719        |
| Ter119                                             | TER-119       | BioLegend         | 116206             | B208450        |
| Sca1                                               | D7, E13-161.7 | BioLegend         | 122514             | B194434        |
| Gr-1                                               | RB6-8C5       | BioLegend         | 108406             | B210647        |
| IgM                                                | II/41         | eBioscience       | 17-5790-92         | 4273397        |
| F4/80                                              | BM8           | BioLegend         | 123110             | B202562        |
| <u>Flow cytometry antibodies (for human cells)</u> |               |                   |                    |                |
| CD34                                               | 4H11          | eBioscience       | 17-0349-42         | E11634-1634    |
| CD45RA                                             | HI100         | eBioscience       | 12-0458-42         | E13995-103     |
| CD38                                               | HIT2          | eBioscience       | 25-0389-42         | E10874-1635    |
| Lineage marker mix                                 |               |                   |                    |                |
| CD2, CD3, CD14,<br>CD16, CD19, CD56,<br>CD235A     | various       | Thermo Fisher     | 22-7778-72         | 4325064        |
| <u>Western Blot antibodies</u>                     |               |                   |                    |                |
| β-actin                                            | AC-74         | Sigma             | A2228              | various        |
| histone H3                                         | ab1791        | Abcam             | ab1791             | GR265016-1     |
| H3K4me3                                            | C42D8         | Cell Signaling    | 9751               | 7              |
| H3K27me3                                           | C36B11        | Cell Signaling    | 9733               | 8              |
| H3K4me2                                            | C75H12        | Cell Signaling    | 2901               | 1              |
| H3K36me2                                           | C64G9         | Cell Signaling    | 9725               | 1              |
